# Supplementary material for: Deashed Wheat-Straw Biochar as a Potential Superabsorbent for Pesticides
Source: MDPI journal article supplement (doi:10.3390/ma16062185), 2023-03-09
Supplement: s1 [file s1]

## Supplementary Materials:

**Table S1.** Elemental composition of pristine (BC) and deashed (BCd) biochars determined with energy-dispersive X-ray spectroscopy (EDX). The  $\pm$  errors [%] are given in the brackets.

| Element | BC         |            |             | BCd        |            |             |
|---------|------------|------------|-------------|------------|------------|-------------|
|         | Weight [%] | Atomic [%] | C error [%] | Weight [%] | Atomic [%] | C error [%] |
| C       | 57.60      | 66.58      | 19.4        | 77.04      | 83.32      | 25.4        |
| O       | 34.69      | 30.11      | 11.4        | 18.54      | 15.05      | 6.4         |
| Si      | 3.64       | 1.80       | 0.2         | 0.21       | 0.10       | 0.0         |
| Mg      | 0.32       | 0.18       | 0.0         | 0.35       | 0.19       | 0.0         |
| S       | 0.04       | 0.02       | 0.0         | 0.16       | 0.06       | 0.0         |

\*exp. Details: line K, Acc. Voltage: 20.0kV, Puls th.:2.47 kcps

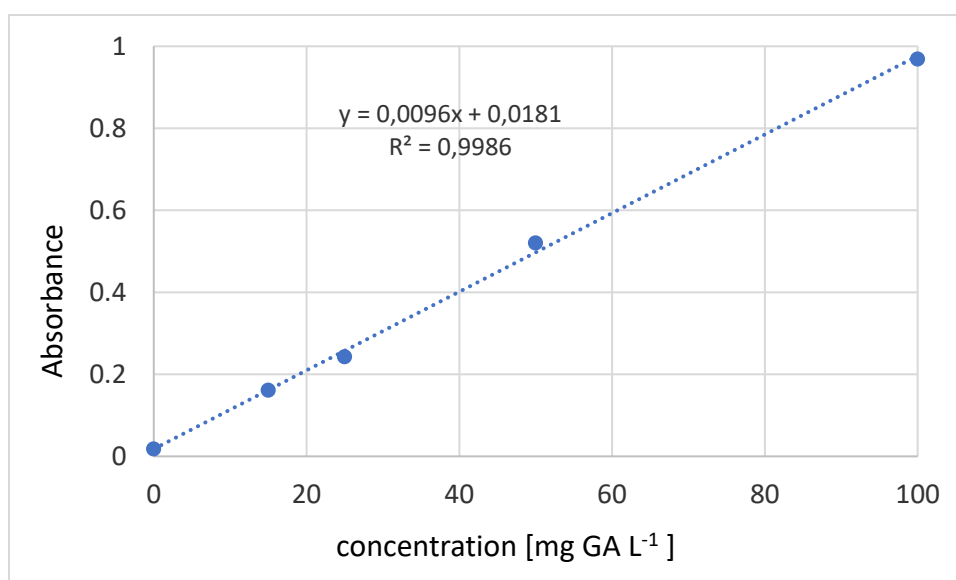

**Figure S1.** Calibration curve for the assessment of total phenolic content by Folin-Ciocalteu method, expressed as gallic acid equivalent [mg of GA L<sup>-1</sup> of extract].
